# Supplementary material for: Colloidal Lignin Particles as Adhesives for Soft Materials
Source: MDPI journal article supplement (doi:10.3390/nano8121001), 2018-12-03
Supplement: s1 [file s1]

# Supplementary Material

## Colloidal lignin particles as adhesives for soft materials

Maija-Liisa Mattinen,<sup>1,\*</sup> Guillaume Riviere,<sup>1</sup> Alexander Henn,<sup>1</sup> Robertus Wahyu N. Nugroho,<sup>1</sup> Timo Leskinen,<sup>1</sup> Outi Nivala,<sup>2</sup> Juan José Valle-Delgado,<sup>1</sup> Mauri A. Kostianen,<sup>3</sup> and Monika Österberg<sup>1</sup>

### 1. Adsorption of proteins on lignin surface

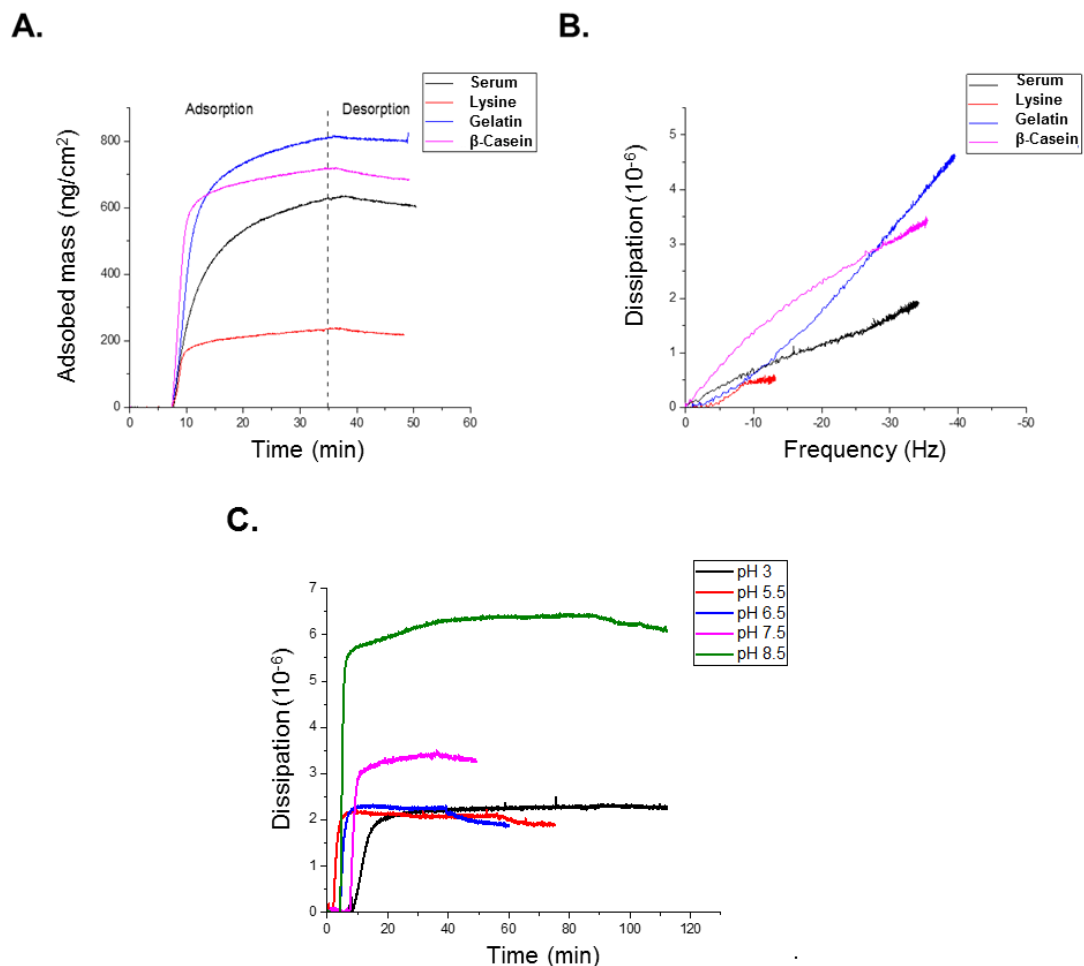

**Figure S1.** Adsorption of model proteins on lignin thin films analyzed by QCM-D. **A)** Frequency data ( $\Delta f_5$ ) from the measurement. **B)** Dissipation during the protein adsorption processes. **C)** Dissipation during the  $\beta$ -casein adsorption on lignin surface at different pH.

## 2. AFM images of CLPs coated with $\beta$ -casein

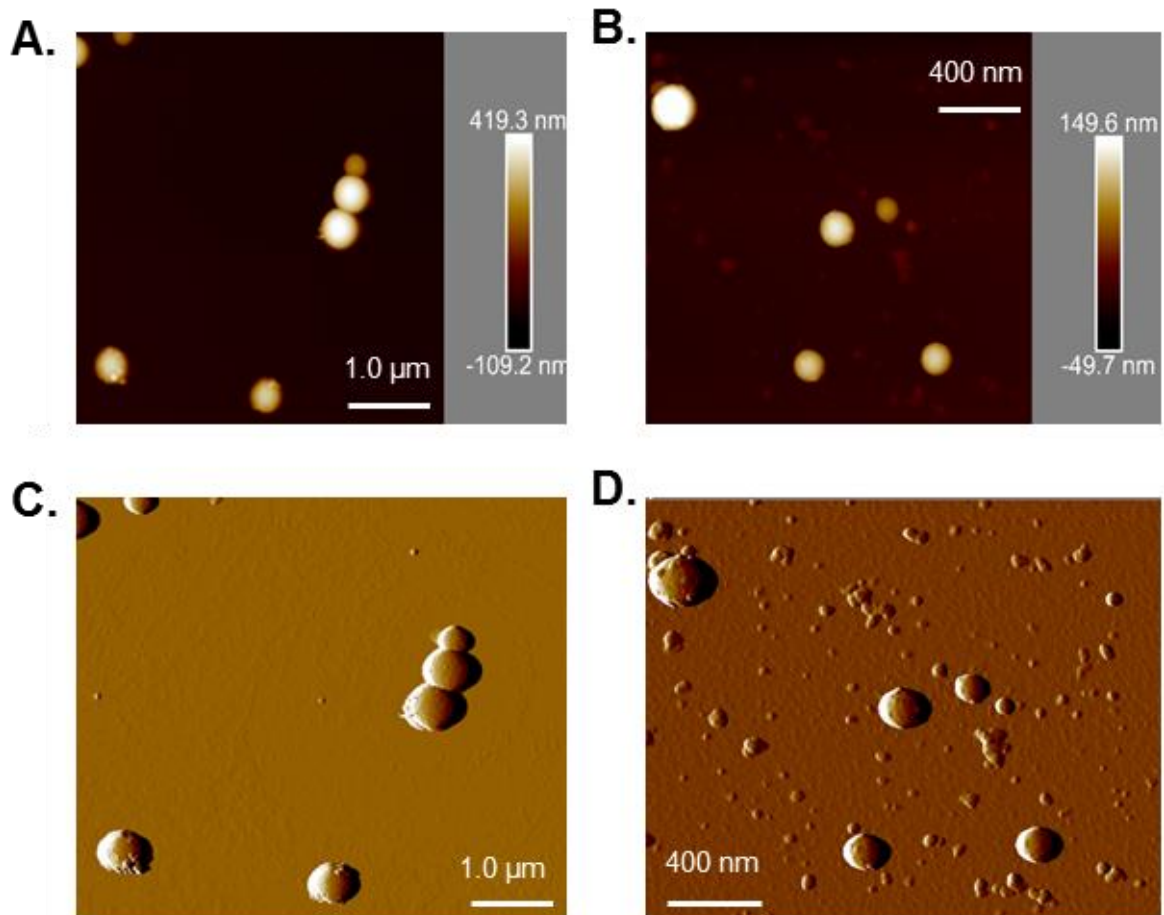

**Figure S2.** AFM images of  $\beta$ -casein coated CLPs. **A)** Reference (height mode). **B)** Protein coated CLPs (height mode). In **(C)** and **(D)** are shown the corresponding NPs in the amplitude mode.

### 3. Characterization of laccase treated lignins by FTIR

The selected bands areas (-OH, -C=O, aromatic, phenolic-OH) measured from the FTIR spectra were normalized with band at 1510 cm<sup>-1</sup> corresponding to elongation vibration of -C=C- in aromatic compounds. The ratios of the selected band areas are shown in the Tables S1 to S3.

#### References

**Table S1. A)** Bands and regions used for drawing the baselines for the determination of band area. **B)** Area of the characteristic frequencies in the FTIR spectra and **C)** calculated ratio for the reference lignins dissolved at pH 4.0, 6.0 and 8.0.

A)

| Band     | Alcohol groups A | Carbonyl groups C | Aromatic groups L1 | Aromatic groups L2 | Phenolic groups P1 | Phenolic group P2 |
|----------|------------------|-------------------|--------------------|--------------------|--------------------|-------------------|
| Region   | 3669 – 3046      | 1803 – 1672       | 1537 – 1480        | 1477 – 1440        | 1439 – 1407        | 1238 – 1179       |
| Baseline | 3695 – 3039      | 1809 – 1546       | 1540 – 903         | 1544 – 903         | 1478 – 1398        | 1244 – 1169       |

B)

| Area             | Alcohol groups A | Carbonyl groups C | Aromatic groups L1 | Aromatic groups L2 | Phenolic groups P1 | Phenolic group P2 |
|------------------|------------------|-------------------|--------------------|--------------------|--------------------|-------------------|
| Lignoboost™ pH 4 | 2.0              | 0.5               | 0.8                | 0.6                | 0.2                | 0.3               |
| Ref pH 6         | 3.5              | 0.9               | 1.2                | 0.9                | 0.2                | 0.4               |
| Ref pH 8         | 6.4              | 1.1               | 1.4                | 1.1                | 0.3                | 0.5               |

C)

| Ratios      | A/L1 | A/L2 | C/L1 | C/L2 | P1/L1 | P1/L2 | P2/L1 | P2/L2 |
|-------------|------|------|------|------|-------|-------|-------|-------|
| Lignoboost™ | 2.4  | 3.3  | 0.6  | 0.9  | 0.2   | 0.3   | 0.4   | 0.5   |
| pH 6 Ref    | 2.8  | 3.8  | 0.8  | 1.0  | 0.2   | 0.3   | 0.3   | 0.5   |
| pH 8 Ref    | 4.5  | 5.6  | 0.8  | 1.0  | 0.2   | 0.3   | 0.3   | 0.4   |

|  |                  |
|--|------------------|
|  | Expected trend   |
|  | Unexpected trend |

The results were considered unexpected when the variation was larger than  $\pm 0.2$  which is the most probably due to variation in the moisture content between the sample preparations.

## pH 6

**Table S2.** A) Bands, regions and baselines used for the determination of the band area. B) Area of characteristic frequencies in the FTIR spectra and C) calculated ratio for the reference and treated-lignin at pH 6.

A)

| Band     | Alcohol groups A | Carbonyl groups C | Aromatic groups L1 | Aromatic groups L2 | Phenolic groups P1 | Phenolic group P2 |
|----------|------------------|-------------------|--------------------|--------------------|--------------------|-------------------|
| Region   | 3688 – 3046      | 1812 – 1678       | 1549 – 1479        | 1479 – 1443        | 1443 – 1398        | 1241 – 1173       |
| Baseline | 3685 – 3033      | 1812 – 901        | 1812 – 901         | 1812 – 901         | 1812 – 901         | 1812 – 901        |

B)

| Area     | Alcohol groups A | Carbonyl groups C | Aromatic groups L1 | Aromatic groups L2 | Phenolic groups P1 | Phenolic group P2 |
|----------|------------------|-------------------|--------------------|--------------------|--------------------|-------------------|
| Ref pH 6 | 3.5              | 0.9               | 1.3                | 0.9                | 1.0                | 2.6               |
| MaL pH 6 | 3.9              | 1.0               | 1.2                | 0.9                | 1.0                | 2.5               |
| ThL pH 6 | 1.9              | 0.6               | 0.6                | 0.4                | 0.5                | 1.2               |

C)

| Ratios   | A/L1 | A/L2 | C/L1 | C/L2 | P1/L1 | P1/L2 | P2/L1 | P2/L2 |
|----------|------|------|------|------|-------|-------|-------|-------|
| Ref pH 6 | 2.8  | 4.0  | 0.7  | 1.0  | 0.8   | 1.1   | 2.0   | 2.9   |
| MaL pH 6 | 3.2  | 4.4  | 0.8  | 1.1  | 0.8   | 1.1   | 2.1   | 2.9   |
| ThL pH 6 | 3.4  | 4.5  | 1.0  | 1.3  | 0.8   | 1.1   | 2.1   | 2.8   |

|  |                  |
|--|------------------|
|  | Expected trend   |
|  | Unexpected trend |

In general, the changes between the reference and laccase treated samples were minor. A/L were interfered by the residual moisture in the sample. P/L was expected as a decreasing trend while C/L was expected as an increasing trend.

## pH 8

**Table S3.** A) Regions and the baselines used for the determination of area. B) Area of characteristic frequencies in the FTIR spectra and C) calculated ratio for the reference and treated-lignin at pH 8.

A)

| Band     | Alcohol groups A | Carbonyl groups C | Aromatic groups L1 | Aromatic groups L2 | Phenolic groups P1 | Phenolic group P2 |
|----------|------------------|-------------------|--------------------|--------------------|--------------------|-------------------|
| Region   | 3679 – 3045      | 1803 – 1678       | 1540 – 1478        | 1477 – 1440        | 1439 – 1397        | 1243 – 1174       |
| Baseline | 3684 – 3024      | 1812 – 901        | 1541 – 901         | 1544 – 902         | 1544 – 902         | 1544 – 902        |

B)

| Area     | Alcohol groups A | Carbonyl groups C | Aromatic groups L1 | Aromatic groups L2 | Phenolic groups P1 | Phenolic group P2 |
|----------|------------------|-------------------|--------------------|--------------------|--------------------|-------------------|
| pH 8 Ref | 6.6              | 1.1               | 1.5                | 1.2                | 1.1                | 3.0               |
| pH 8 MaL | 5.7              | 1.5               | 1.7                | 1.3                | 1.2                | 3.5               |

C)

| Ratios   | A/L1 | A/L2 | C/L1 | C/L2 | P1/L1 | P1/L2 | P2/L1 | P2/L2 |
|----------|------|------|------|------|-------|-------|-------|-------|
| pH 8 Ref | 4.4  | 5.7  | 0.7  | 1.0  | 0.8   | 1.0   | 2.0   | 2.6   |
| pH 8 MaL | 3.4  | 4.4  | 0.9  | 1.1  | 0.7   | 0.9   | 2.1   | 2.7   |

|  |                  |
|--|------------------|
|  | Expected trend   |
|  | Unexpected trend |

Also, at pH 8 the differences between the references and laccase treated samples were minor. A/L and P/L were expected to decrease while C/L was expected to increase.

#### 4. CLPs prepared from enzymatically oxidized Lignoboost™

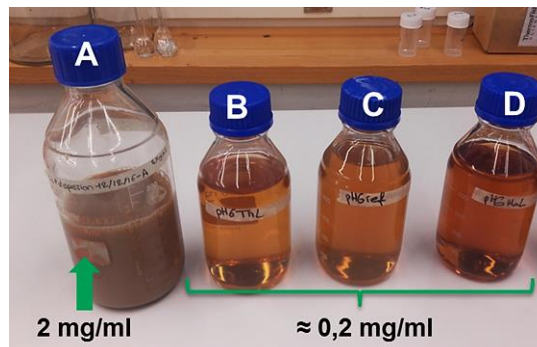

**Figure S3.** CLP dispersions prepared from laccases treated lignins. **A)** Lignoboost™ using method developed Lievonen<sup>25</sup>, **B)** ThL-, **C)** reference and **D)** MaL-treated lignins at pH 6.0.

#### 5. AFM images from tiny CLPs for CNF coating

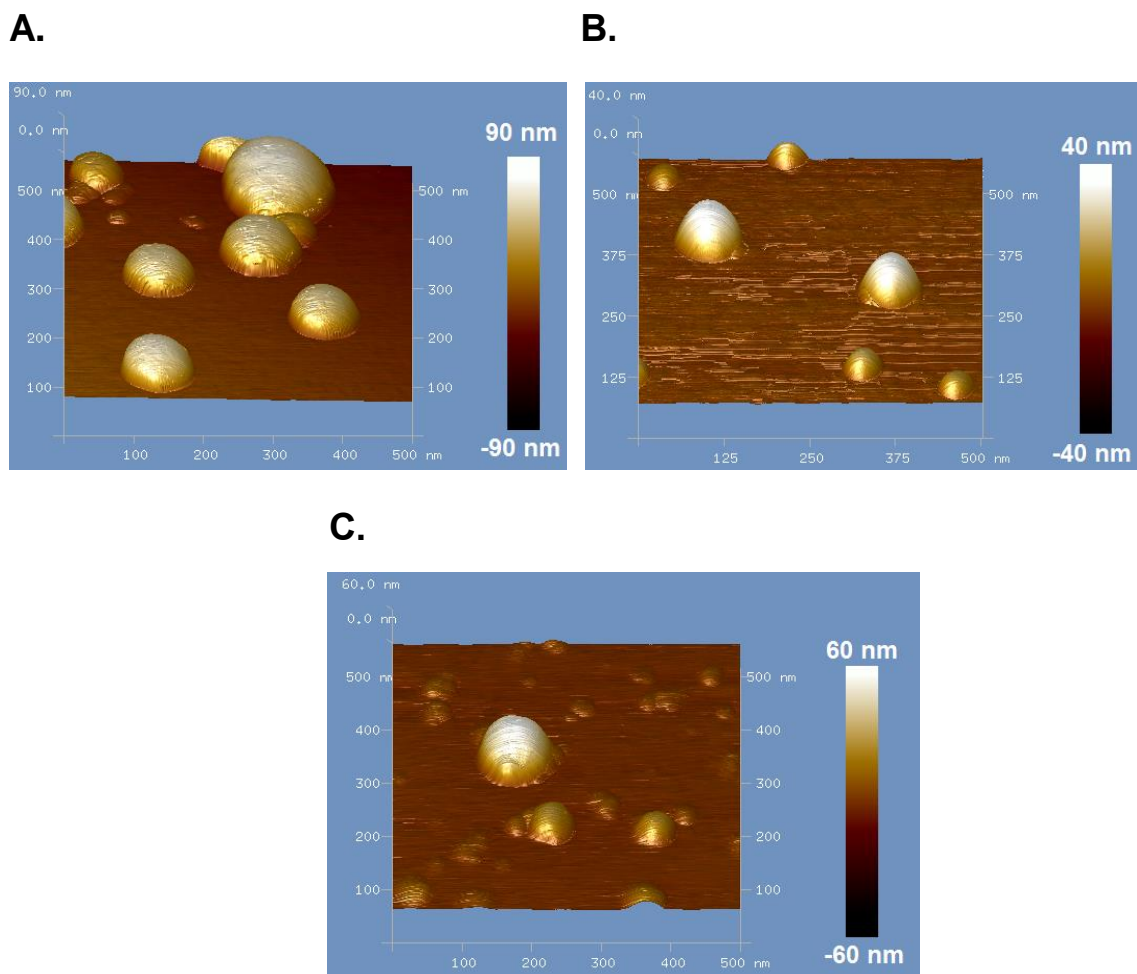

**Figure S4.** AFM height images from CLPs prepared from laccase treated lignin at pH 6. **A)** Reference, **B)** particles from MaL and **C)** ThL -treated lignin.

**Table S4.** Effect of time on the average particle size, zeta potential and polydispersity (PDI) of CLPs prepared from different lignins at starting concentration  $0.5 \text{ g L}^{-1}$ .

| Days | Samples  | Average size (nm) | Zeta potential (mV) | PDI             |
|------|----------|-------------------|---------------------|-----------------|
| 1    | pH 6 Ref | $120 \pm 1$       | $-34 \pm 1$         | $0.08 \pm 0.01$ |
|      | pH 6 MaL | $117 \pm 1$       | $-35 \pm 1$         | $0.12 \pm 0.02$ |
|      | pH 6 ThL | $120 \pm 1$       | $-33 \pm 3$         | $0.33 \pm 0.03$ |
|      | pH 8 Ref | $107 \pm 3$       | $-30 \pm 2$         | $0.11 \pm 0.00$ |
|      | pH 8 MaL | $83 \pm 1$        | $-37 \pm 1$         | $0.13 \pm 0.02$ |
| 4    | pH 6 Ref | $119 \pm 1$       | $-21 \pm 1$         | $0.09 \pm 0.01$ |
|      | pH 6 MaL | $115 \pm 1$       | $-35 \pm 1$         | $0.11 \pm 0.02$ |
|      | pH 6 ThL | $116 \pm 1$       | $-33 \pm 2$         | $0.30 \pm 0.01$ |
|      | pH 8 Ref | $101 \pm 1$       | $-27 \pm 1$         | $0.10 \pm 0.01$ |
|      | pH 8 MaL | $82 \pm 1$        | $-32 \pm 1$         | $0.13 \pm 0.01$ |
| 7    | pH 6 Ref | $105 \pm 1$       | $-19 \pm 1$         | $0.12 \pm 0.02$ |
|      | pH 6 MaL | $75 \pm 1$        | $-20 \pm 2$         | $0.13 \pm 0.05$ |
|      | pH 6 ThL | $102 \pm 2$       | $-36 \pm 3$         | $0.37 \pm 0.03$ |
|      | pH 8 Ref | $99 \pm 1$        | $-18 \pm 1$         | $0.11 \pm 0.02$ |
|      | pH 8 MaL | $82 \pm 2$        | $-21 \pm 1$         | $0.13 \pm 0.02$ |
| 30   | pH 6 Ref | $120 \pm 1$       | $-26 \pm 2$         | $0.09 \pm 0.01$ |
|      | pH 6 MaL | $121 \pm 3$       | $-37 \pm 1$         | $0.11 \pm 0.02$ |
|      | pH 6 ThL | $121 \pm 1$       | $-39 \pm 1$         | $0.32 \pm 0.02$ |
|      | pH 8 Ref | $104 \pm 1$       | $-36 \pm 3$         | $0.12 \pm 0.02$ |
|      | pH 8 MaL | $83 \pm 2$        | $-33 \pm 1$         | $0.14 \pm 0.01$ |

## 6. TEM images from tiny CLPs used for CNF coating

**A.**

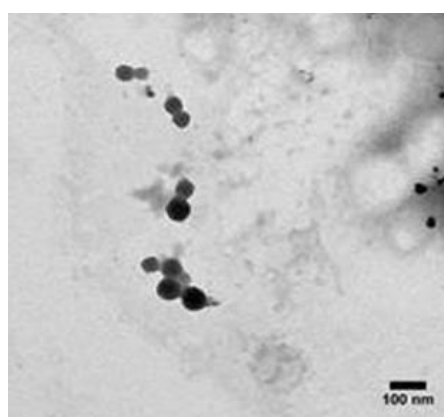

**B.**

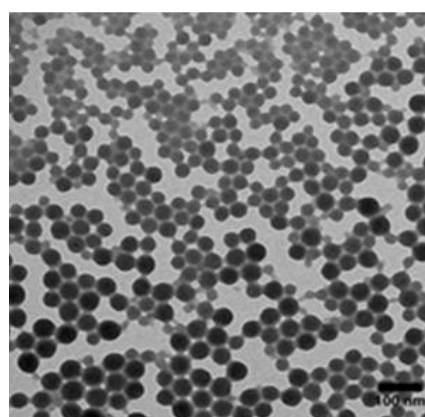

**Figure S5.** TEM images from CLPs prepared from enzymatically treated lignin one month after preparation. **A)** ThL-treatment (pH 6.0). **B)** Reference.

## 7. Coating poly(L-lysine) modified CLPs with poly(L-glutamic acid)

A.

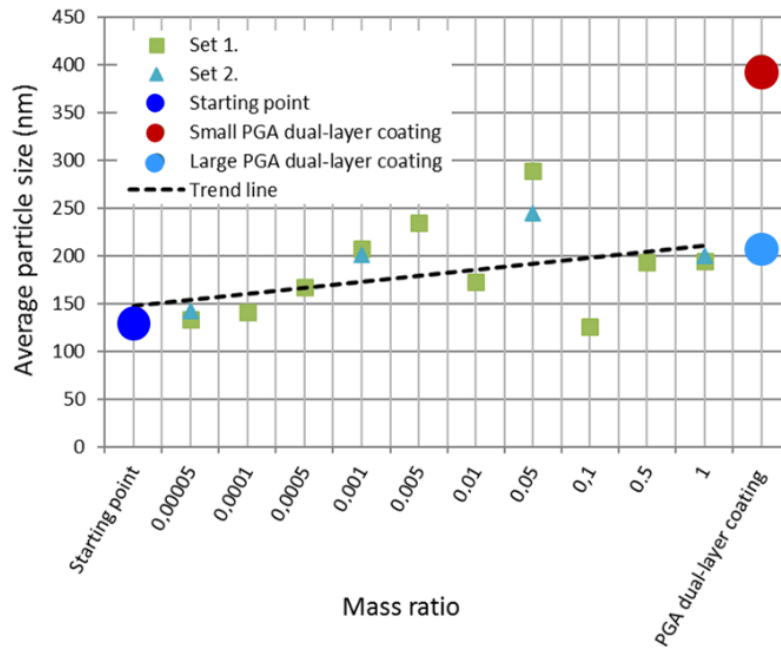

B.

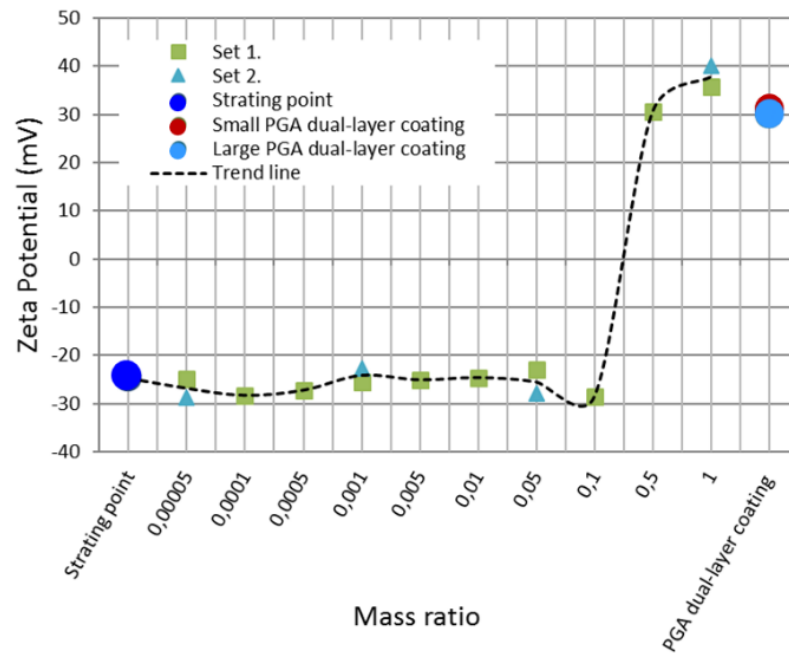

**Figure S6.** Average particle size and zeta potential of CLPs as a function of PL – CLP mass ratio. **A)** Average particle size (starting particle size: ca. 131 nm) and **B)** zeta potential. A trend line (a guide for the eye) is shown above the data points.



## 8. Adsorption of model proteins and CLPs on CNF surface

**A.**

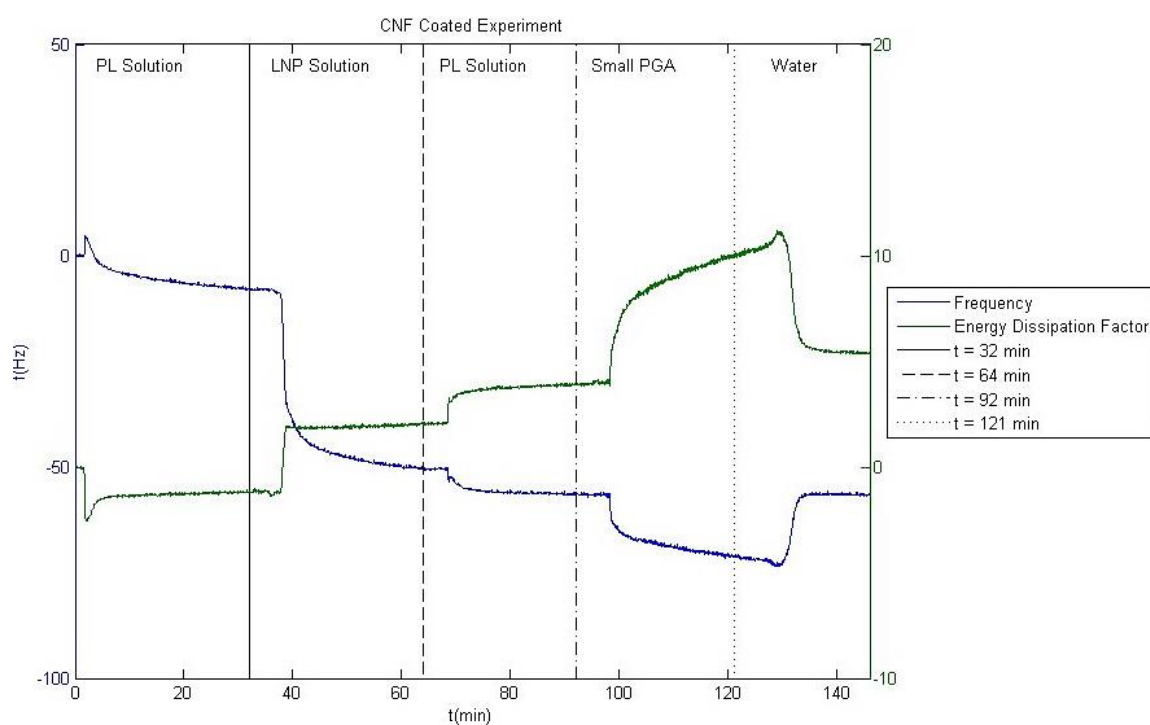

**B.**

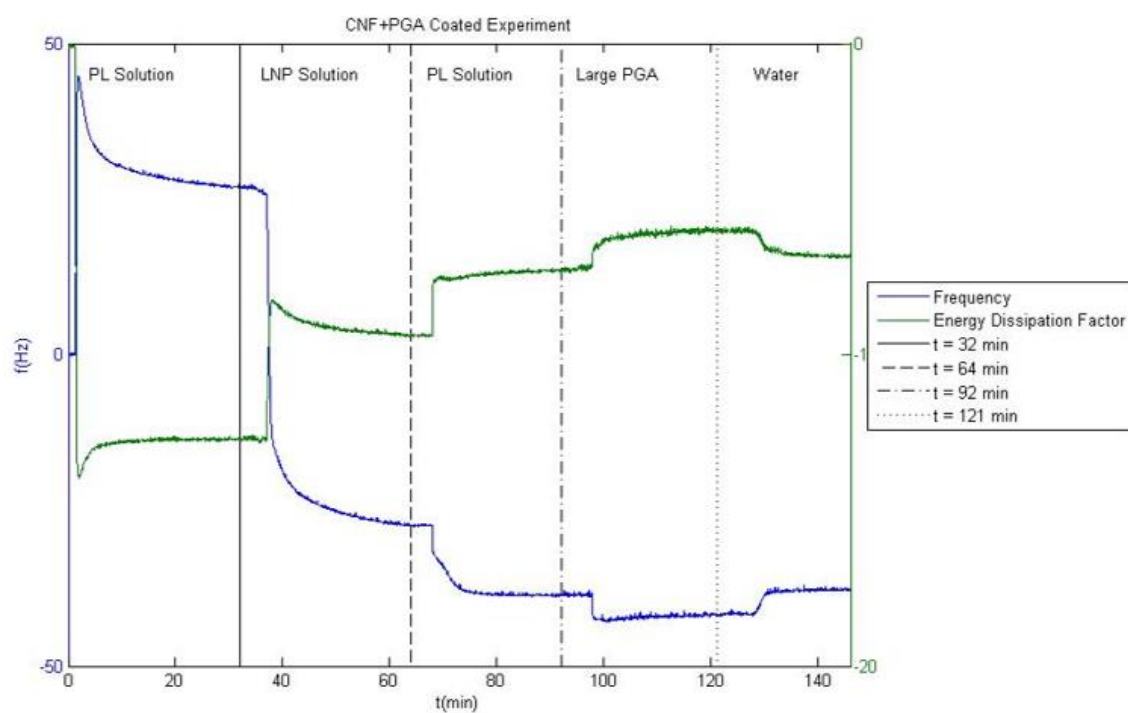

**Figure S7.** Adsorption of PL, PGA and CLPs on slightly negatively charged CNF analyzed by QCM-D. **A)** Small PGA (15 – 50 kDa) and **B)** large PGA (50 – 100 kDa).

## 9. Enzymatic stabilization of $\beta$ -coated CLPs using Tgase

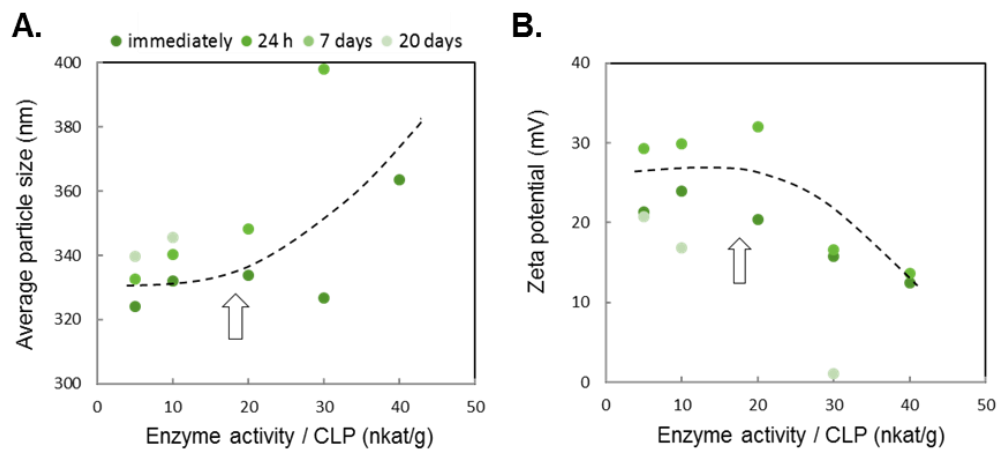

**Figure S8.**  $\beta$ -Casein coating and enzymatic stabilization of the particles with Tgase. Optimization of Tgase dosage for the cross-linking reactions as evidenced using **A)** particle size and **B)** zeta potential measurement as a function of time.

## 10. Inhibition of Tgase activity

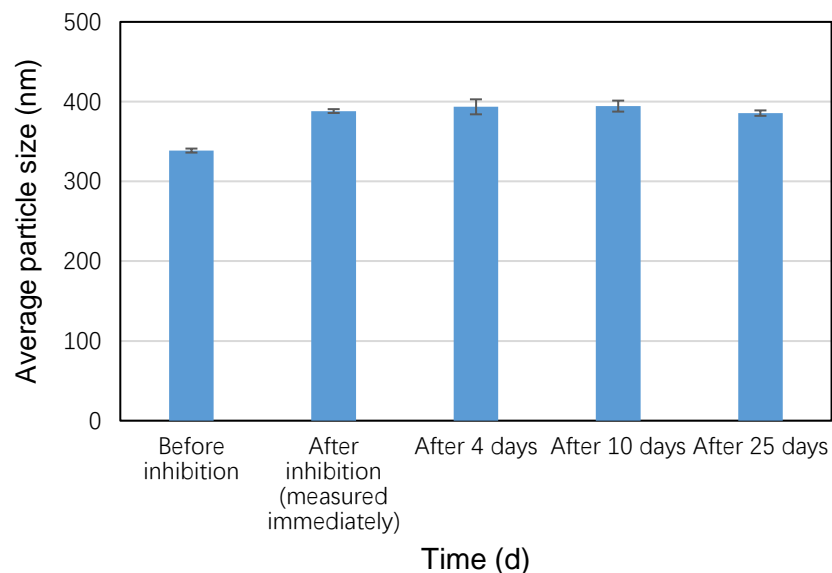

**Figure S9.** Variation of stabilized CLPs in size after removal of enzyme activity using ultracentrifugation.

# 11. Elasticity of $\beta$ -casein coating on CLP cross-linked with Tgase

A.

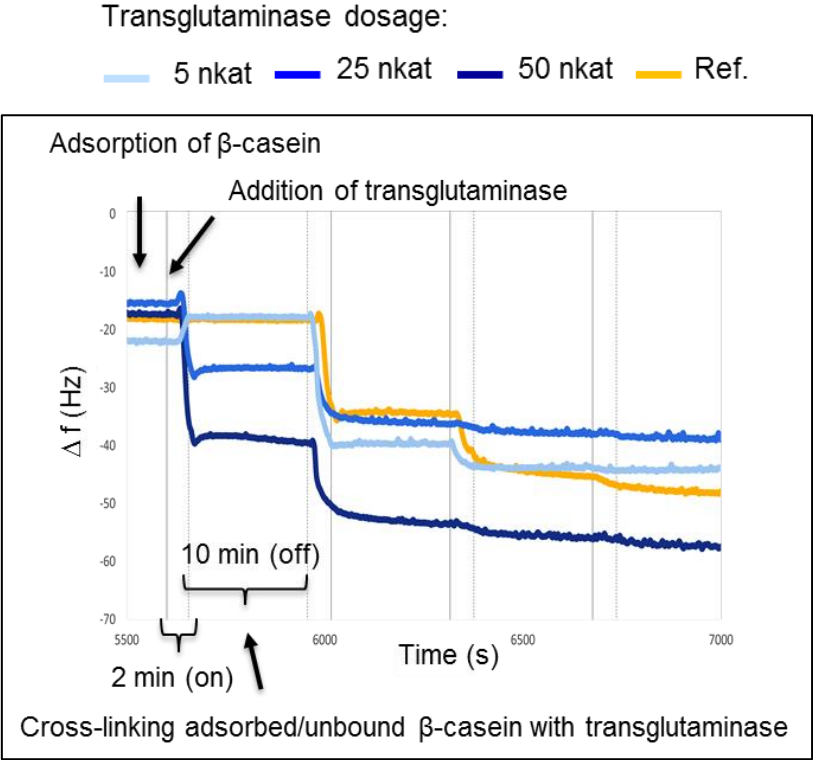

B.

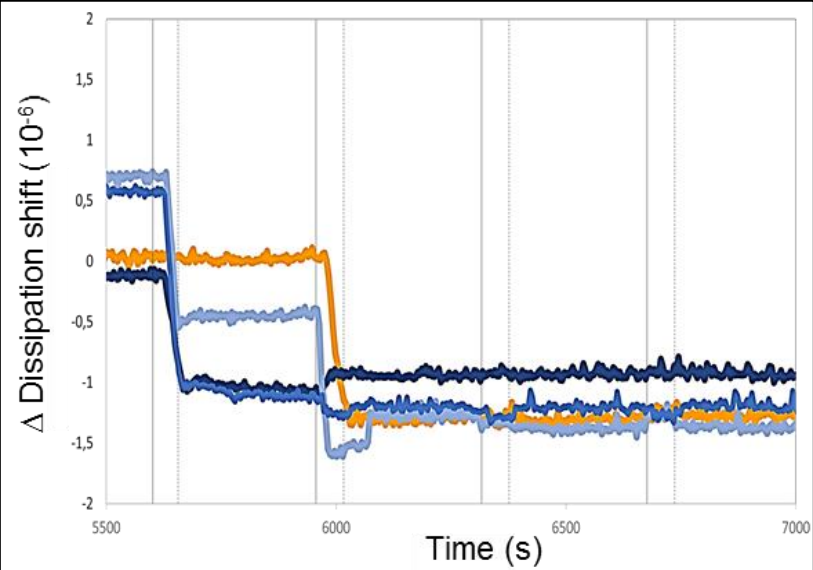

**Figure S10.** Elasticity of enzymatically cross-linked  $\beta$ -casein coating. Adsorption of  $\beta$ -casein on lignin surface following addition of Tgase in the QCM-D chamber and enzymatic cross-linking of adsorbed and unbound  $\beta$ -casein with Tgase using different enzyme dosages in the measuring cell ( $40 \mu\text{l}$ ). In the reference Tgase activity was inhibited using heat treatment ( $60^\circ\text{C}$ ).
